# Supplementary material for: Proteomic Signature and mRNA Expression in Hippocampus of SAMP8 and SAMR1 Mice during Aging
Source: MDPI journal article supplement (doi:10.3390/ijms232315097), 2022-12-01
Supplement: s1 [file s1]

## *Supplementary Material*

**Table S1: Hippocampal protein MS-identified in SAMR1 4 month aged.**

AC: accession number, to identify the protein from SWISS PROT database; FV: fold variation,

|                       | Protein name                                     | Acronyms     | AC     | Theoretical<br>Mr <sub>pI</sub> | Experimental<br>Mr <sub>pI</sub> | <i>p</i>             | PMF/<br>MS <sub>2</sub> | FV       |
|-----------------------|--------------------------------------------------|--------------|--------|---------------------------------|----------------------------------|----------------------|-------------------------|----------|
| <i>Up-regulated</i>   | Actin-related protein<br>2/3 complex subunit     | <b>ARPC5</b> | Q9CPW4 | 16335_5.47                      | 16901_5.1                        | 0.004                | 4/1                     | 0.3±0.02 |
| <i>Down-Regulated</i> | Stathmin (1)                                     | <b>STMN1</b> | P54227 | 17264_5.76                      | 17158_5.6                        | 6.4x10 <sup>-6</sup> | 11/2                    | 0.6±0.1  |
| <i>Down-Regulated</i> | Stathmin (2)                                     | <b>STMN1</b> | P54227 | 17264_5.76                      | 17406_5.3                        | 7.5x10 <sup>-7</sup> | 11/2                    | 1.1±0.08 |
| <i>Down-Regulated</i> | Alpha-soluble NSF<br>attachment protein          | <b>SNAA</b>  | Q9DB05 | 33624_5.30                      | 26297_5.1                        | 0.1                  | 8/2                     | 0.7±0.1  |
| <i>Down-Regulated</i> | Inorganic<br>pyrophosphatase                     | <b>IPYR</b>  | Q9D819 | 33102_5.37                      | 27560_5.3                        | 0.004                | 14/-                    | 1.7±0.2  |
| <i>Down-Regulated</i> | Annexin A5                                       | <b>ANXA5</b> | P48036 | 35787_4.83                      | 27098_4.8                        | 0.2                  | 19/1                    | 1.6±0.07 |
| <i>Down-Regulated</i> | EF-hand domain-<br>containing protein D2         | <b>EFHD2</b> | Q9D8Y0 | 26775_5.01                      | 26775_5.01                       | 5.3x10 <sup>-5</sup> | 20/2                    | 1.6±0.08 |
| <i>Down-Regulated</i> | Calbindin OS                                     | <b>CALB1</b> | P12658 | 30203_4.71                      | 23050_4.7                        | 0.004                | 18/2                    | 0.8±0.2  |
| <i>Down-Regulated</i> | Malate dehydrogenase<br>cytoplasmatic            | <b>MDHC</b>  | P14152 | 36659_6.16                      | 27797_5.6                        | 0.009                | 16/1                    | 1.6±0.15 |
| <i>Down-Regulated</i> | Microfibrillar-<br>associated protein 3-<br>like | <b>MFA3L</b> | Q9D3X9 | 45769_5.00                      | 26337_6.1                        | 0.1                  | 9/-                     | 0.9±0.17 |
| <i>Down-Regulated</i> | Fatty acid-binding<br>protein, heart             | <b>FABPH</b> | P11404 | 14810_6.11                      | 14560_5.4                        | 3.0x10 <sup>-4</sup> | 9/3                     | 1.2±0.05 |
| <i>Down-Regulated</i> | Superoxide dismutase                             | <b>SODC</b>  | P08228 | 16104_6.02                      | 16104_5.9                        | 6.8x10 <sup>-4</sup> | 4/2                     | 1.0±0.08 |
| <i>Down-Regulated</i> | Protein phosphatase 1<br>regulatory subunit 7    | <b>PP1R7</b> | Q3UM45 | 41380_4.85                      | 34021_4.9                        | 0.01                 | 12/-                    | 0.4±0.1  |
| <i>Down-Regulated</i> | Protein phosphatase 1<br>regulatory subunit 7    | <b>PP1R7</b> | Q3UM45 | 41380_4.85                      | 33971_4.9                        | 0.02                 | 13/2                    | 0.4±0.1  |
| <i>Down-Regulated</i> | 40S ribosomal protein<br>SA                      | <b>RSSA</b>  | P14206 | 32931_4.80                      | 31644_4.8                        | 0.01                 | 15/3                    | 1.47±0.2 |
| <i>Down-Regulated</i> | Dopachrome<br>decarboxylase                      | <b>DOPD</b>  | O35215 | 13183_6.09                      | 14213_6.1                        | 0.002                | 6/3                     | 0.7±0.2  |

expression level degree. Mr<sub>2</sub>: relative molecular mass; PMF/ MS<sub>2</sub>: Peptide mass fingerprint/ Mass spectrometry. Statistical significance: *p*<0.001.

**Table S2: Hippocampal protein MS-identified in SAMP8 4 month aged.**

|                           | Protein name                                  | Acronyms     | AC     | Theoretical Mr_pI | Experimental Mr_pI | p                    | PMF/ MS <sub>2</sub> | FV       |
|---------------------------|-----------------------------------------------|--------------|--------|-------------------|--------------------|----------------------|----------------------|----------|
| <i>Up-regulated</i>       | Kemiline reductase mu-crystallin              | <b>CRYM</b>  | O54983 | 33673_5.44        | 29128_5.2          | 8.3x10 <sup>-8</sup> | 10/3                 | 2.0±0.2  |
| <i>Up-regulated</i>       | Phosphoglycerate mutase 1                     | <b>PGAM1</b> | Q9DBJ1 | 28928_6.67        | 24391_6.3          | 5.2x10 <sup>-5</sup> | 13/3                 | 1.8±0.2  |
| <i>Up-regulated</i>       | V-type proton ATPase subunit B, brain isoform | <b>VATB2</b> | P62814 | 56857_5.57        | 37762_5.7          | 0.01                 | 14/2                 | 1.5±0.3  |
| <i>Up-regulated</i>       | Dual specificity protein phosphatase 3        | <b>DUS3</b>  | Q9D7X3 | 20687_6.07        | 20633_5.7          | 7.6x10 <sup>-4</sup> | 8/3                  | 0.4±0.2  |
| <i>Up-regulated</i>       | Malate dehydrogenase cytoplasmic              | <b>MDHC</b>  | P14152 | 36659_6.16        | 28607_6.2          | 0.006                | 16/2                 | 1.8±0.1  |
| <i>Down-regulated</i>     | Eukaryotic initiation factor 4A-I             | <b>IF4A1</b> | P60843 | 46125_5.32        | 34942_5.3          | 0.007                | 20/3                 | 2.0±0.05 |
| <i>Down-regulated</i>     | Stathmin                                      | <b>STMN1</b> | P54227 | 17264_5.76        | 17158_5.6          | 6.4x10 <sup>-6</sup> | 11/2                 | 0.6±0.1  |
| <i>Down-regulated</i>     | Stathmin                                      | <b>STMN1</b> | P54227 | 17264_5.76        | 17406_5.3          | 7.5x10 <sup>-7</sup> | 11/2                 | 1.1±0.08 |
| <i>Down-regulated</i>     | Superoxide dismutase                          | <b>SODC</b>  | P08228 | 16104_6.02        | 16104_6.0          | 0.001                | 11/2                 | 1.3±0.05 |
| <i>Newly constitutive</i> | Pyridoxal kinase                              | <b>PDXK</b>  | Q8K183 | 35278_5.88        | 28997_5.6          | 0.06                 | 9/2                  | 1.6±0.4  |

AC: accession number, to identify the protein from SWISS PROT database; FV: fold variation, expression level degree. Mr2: relative molecular mass; PMF/ MS2: Peptide mass fingerprint/ Mass spectrometry. Statistical significance: p<0.001.
